# Supplementary material for: The impact of calibrating soil organic carbon model Yasso with multiple datasets
Source: Copernicus journal article supplement (doi:10.5194/gmd-2021-273), 2021-09-24

# Overall density of all chains

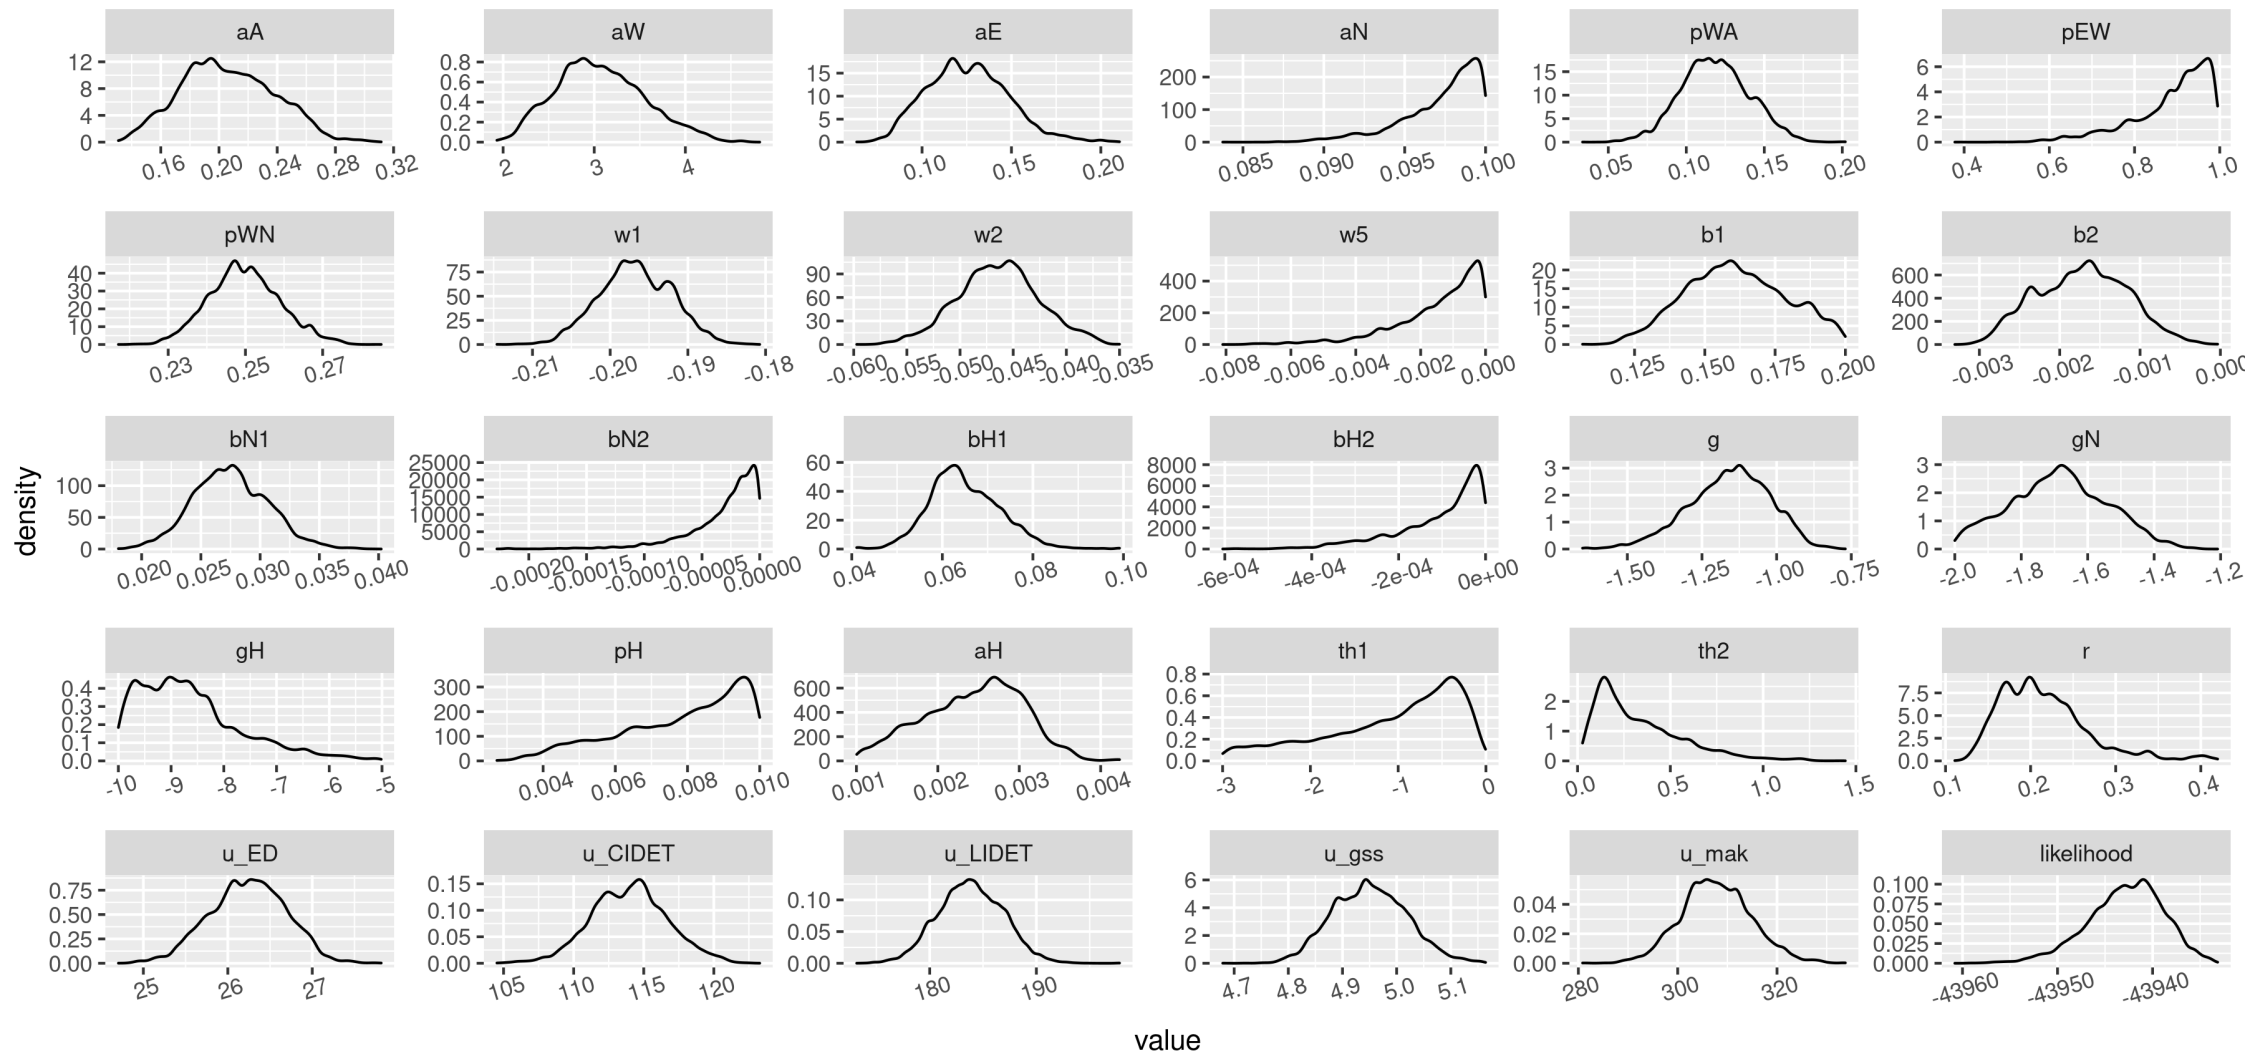

Supplement: Supplementary file [file gmd-2021-273-AC1-supplement.pdf]
